# Supplementary material for: Chloride Applied via Fertilizer Affects Plant Nutrition and Coffee Quality
Source: Plants (Basel). 2023 Feb 15;12(4):885. doi: 10.3390/plants12040885 (PMC9968041; doi:10.3390/plants12040885)
Supplement: Supplementary file 1 [file plants-12-00885-s001.zip › plants-2150197-supplementary.pdf]

**Table S1.** Variables analyzed in the coffee beans for the harvest of 2017/2018

| Treatments | CQ    | Pol  | TS    | Caf   | PPO   | TTA    | EC    |
|------------|-------|------|-------|-------|-------|--------|-------|
| T1         | 80.5a | 6.3a | 9.9a  | 1.06a | 48.2a | 183.2a | 87.5a |
| T2         | 81.2a | 6.4a | 9.5a  | 1.04a | 45.8a | 182.8a | 89.1a |
| T3         | 81.2a | 6.3a | 10.0a | 1.03a | 49.3a | 191.5a | 96.1a |
| T4         | 81.0a | 6.5a | 10.2a | 1.08a | 47.0a | 193.3a | 92.1a |
| T5         | 81.2a | 6.4a | 9.2a  | 1.05a | 46.9a | 185.2a | 93.3a |
| Control    | 81.0a | 6.7a | 9.6a  | 1.00a | 48.2a | 181.7a | 92.6a |
| CV (%)     | 1.7   | 2.3  | 5.5   | 6.5   | 3.3   | 4.3    | 4.6   |
| Mean       | 81.0  | 6.4  | 9.7   | 1.04  | 47.6  | 186.5  | 91.8  |

CV (%) = coefficient of variation; CQ = cup quality score; Pol = total phenolic compounds (%); TS = content of total sugars (%); Caf = content of caffeine (%); PPO = polyphenol oxidase activity ( $\text{u min}^{-1} \text{g}^{-1}$ ); TTA = total tritable acidity ( $\text{mL NaOH } 0.1 \text{ N } 100 \text{ g}^{-1}$ ). Means followed by the same letter in column do not differ according to Tukey's test ( $P > 0.05$ ). T1: 100% KCl; T2: 75% KCl + 25%  $\text{K}_2\text{SO}_4$ ; T3: 50% KCl + 50%  $\text{K}_2\text{SO}_4$ ; T4: 25% KCl + 75%  $\text{K}_2\text{SO}_4$ ; T5: 100%  $\text{K}_2\text{SO}_4$ ; control did not receive  $\text{K}_2\text{O}$ .

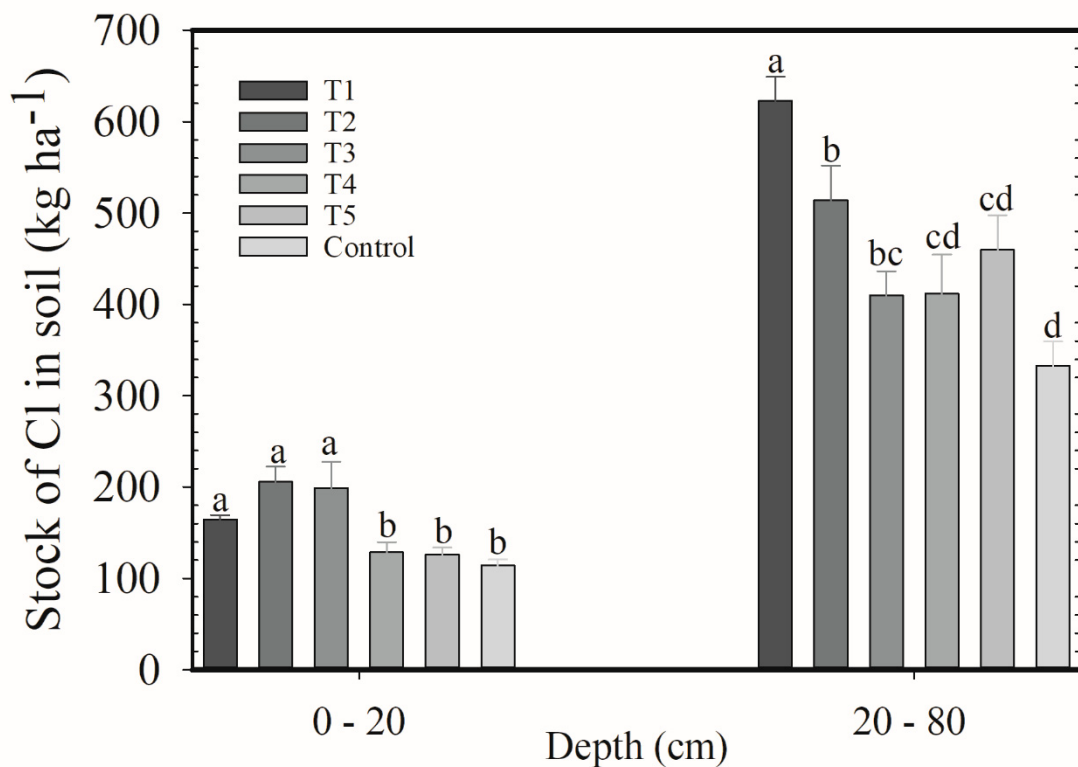

**Figure S1.** Stocks of Cl in the 0-20 and 20-80 cm layers after application of KCl and  $\text{K}_2\text{SO}_4$  blends as cover fertilization on coffee plants. Harvest of 2017/2018. Means followed by the same letter do not differ according to Tukey's test ( $P < 0.05$ ). Vertical bars indicate the standard error of the mean ( $n = 4$ ). T1: 100% KCl; T2: 75% KCl + 25%  $\text{K}_2\text{SO}_4$ ; T3: 50% KCl + 50%  $\text{K}_2\text{SO}_4$ ; T4: 25% KCl + 75%  $\text{K}_2\text{SO}_4$ ; T5: 100%  $\text{K}_2\text{SO}_4$ ; control did not receive  $\text{K}_2\text{O}$ .

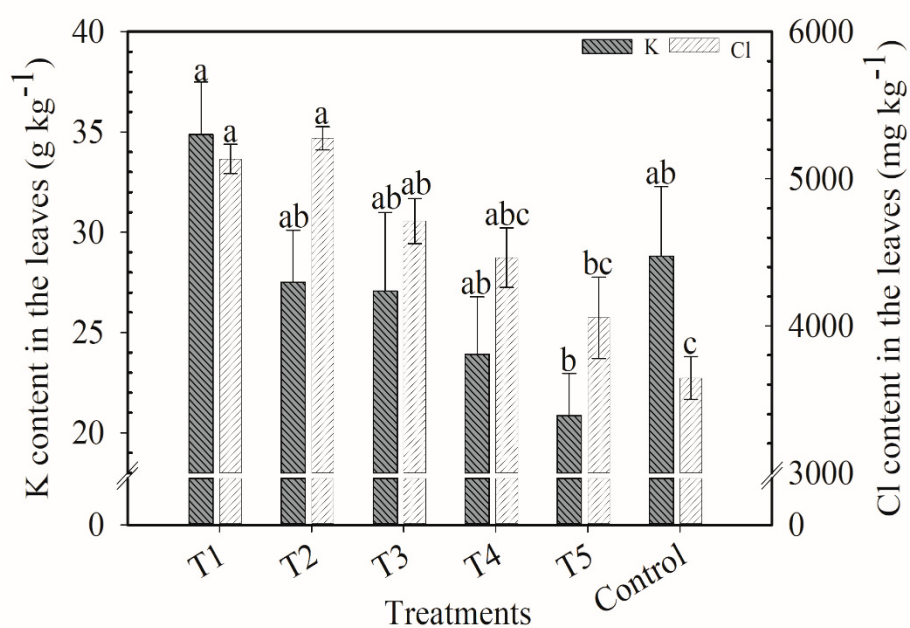

**Figure S2.** K and Cl content in the leaves of coffee plants, 20 days after application of the second cover fertilization parcel. Harvest of 2017/2018. Means followed by the same letter do not differ according to Tukey's test ( $P < 0.05$ ). Vertical bars indicate the standard error of the mean ( $n = 4$ ). T1: 100% KCl; T2: 75% KCl + 25%  $K_2SO_4$ ; T3: 50% KCl + 50%  $K_2SO_4$ ; T4: 25% KCl + 75%  $K_2SO_4$ ; T5: 100%  $K_2SO_4$ ; control did not receive  $K_2O$ .

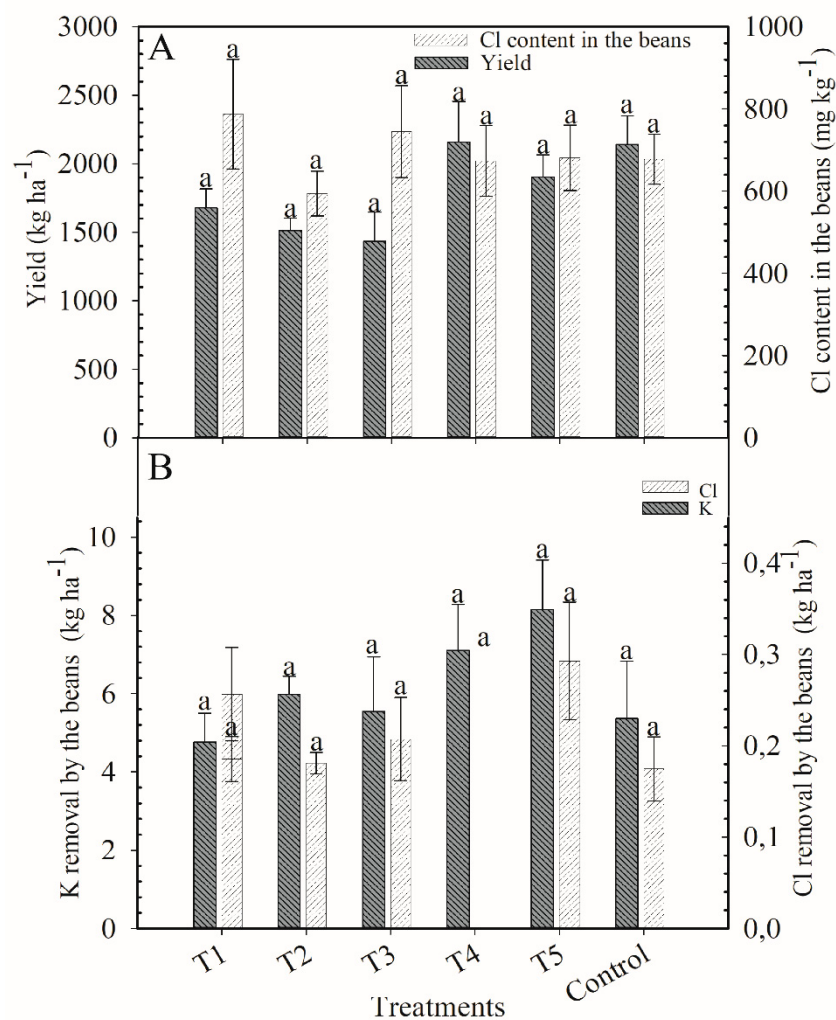

**Figure S3.** Yield of coffee plants and Cl content in the beans at cherry stage (A) and K and Cl re-moval by the beans (B) after application of blends of KCl e  $\text{K}_2\text{SO}_4$  as cover fertilization. Harvest of 2017/2018. Means followed by the same letter do not differ according to Tukey's test ( $P < 0.05$ ). Vertical bars indicate the standard error of the mean ( $n = 4$ ). T1: 100% KCl; T2: 75% KCl + 25%  $\text{K}_2\text{SO}_4$ ; T3: 50% KCl + 50%  $\text{K}_2\text{SO}_4$ ; T4: 25% KCl + 75%  $\text{K}_2\text{SO}_4$ ; T5: 100%  $\text{K}_2\text{SO}_4$ ; control did not receive  $\text{K}_2\text{O}$ .

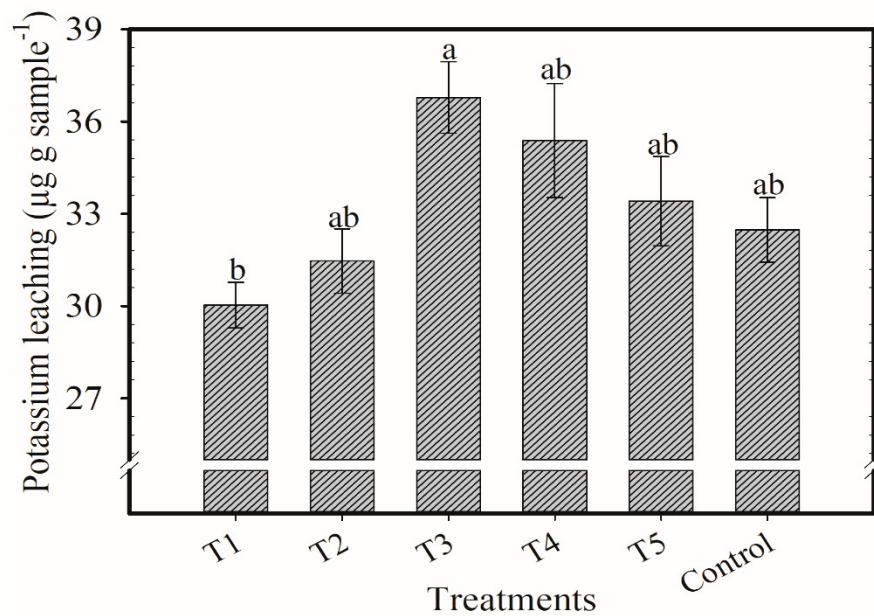

**Figure S4.** Potassium leaching in coffee beans at stage of cherry after application of blends of KCl e K<sub>2</sub>SO<sub>4</sub> as cover fertilization. Harvest of 2017/2018. Means followed by the same letter do not differ according to Tukey's test ( $P < 0.05$ ). Vertical bars indicate the standard error of the mean ( $n = 4$ ). T1: 100% KCl; T2: 75% KCl + 25% K<sub>2</sub>SO<sub>4</sub>; T3: 50% KCl + 50% K<sub>2</sub>SO<sub>4</sub>; T4: 25% KCl + 75% K<sub>2</sub>SO<sub>4</sub>; T5: 100% K<sub>2</sub>SO<sub>4</sub>; control did not receive K<sub>2</sub>O.

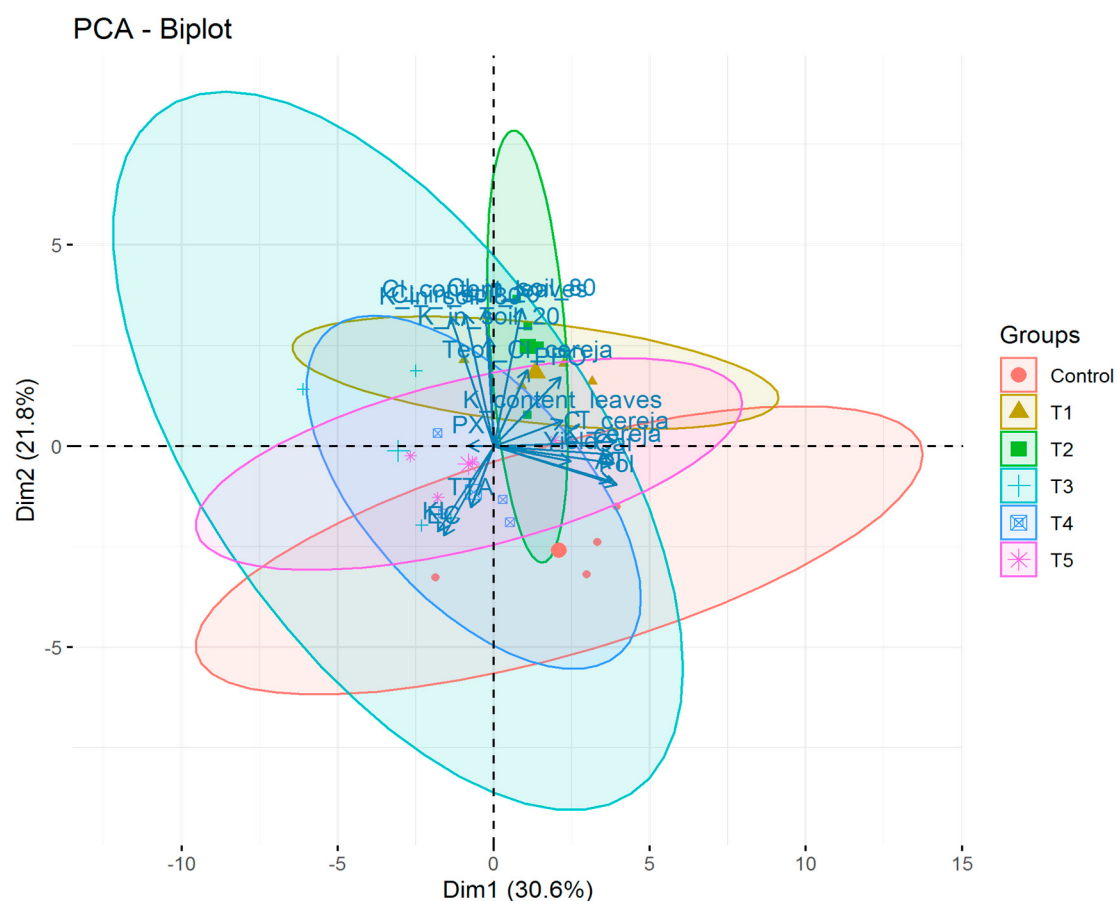

**Figure S5.** Principal component analysis for the harvest of 2017/2018 considering agronomic data. PPO = activity of the enzyme polyphenol oxidase; KL = K leaching; TTA = total titratable acidity; EC = electric conductivity; Pol = total phenolic compounds; Caf = content of caffeine; TS = content of total sugars; K in the soil 20 = stock of K in the 0-20 cm layer; K in the soil 80 = stock of K in the 20-80 cm layer; Cl in the soil 20 = stock of Cl in the 0-20 cm layer; Cl in the soil 80 = stock of Cl in the 20-80 cm layer, K rem. by beans: K removal by the beans, Cl rem. by beans: Cl removal by the beans. T1: 100% KCl; T2: 75% KCl + 25% K<sub>2</sub>SO<sub>4</sub>; T3: 50% KCl + 50% K<sub>2</sub>SO<sub>4</sub>; T4: 25% KCl + 75% K<sub>2</sub>SO<sub>4</sub>; T5: 100% K<sub>2</sub>SO<sub>4</sub>; control did not receive K<sub>2</sub>O.

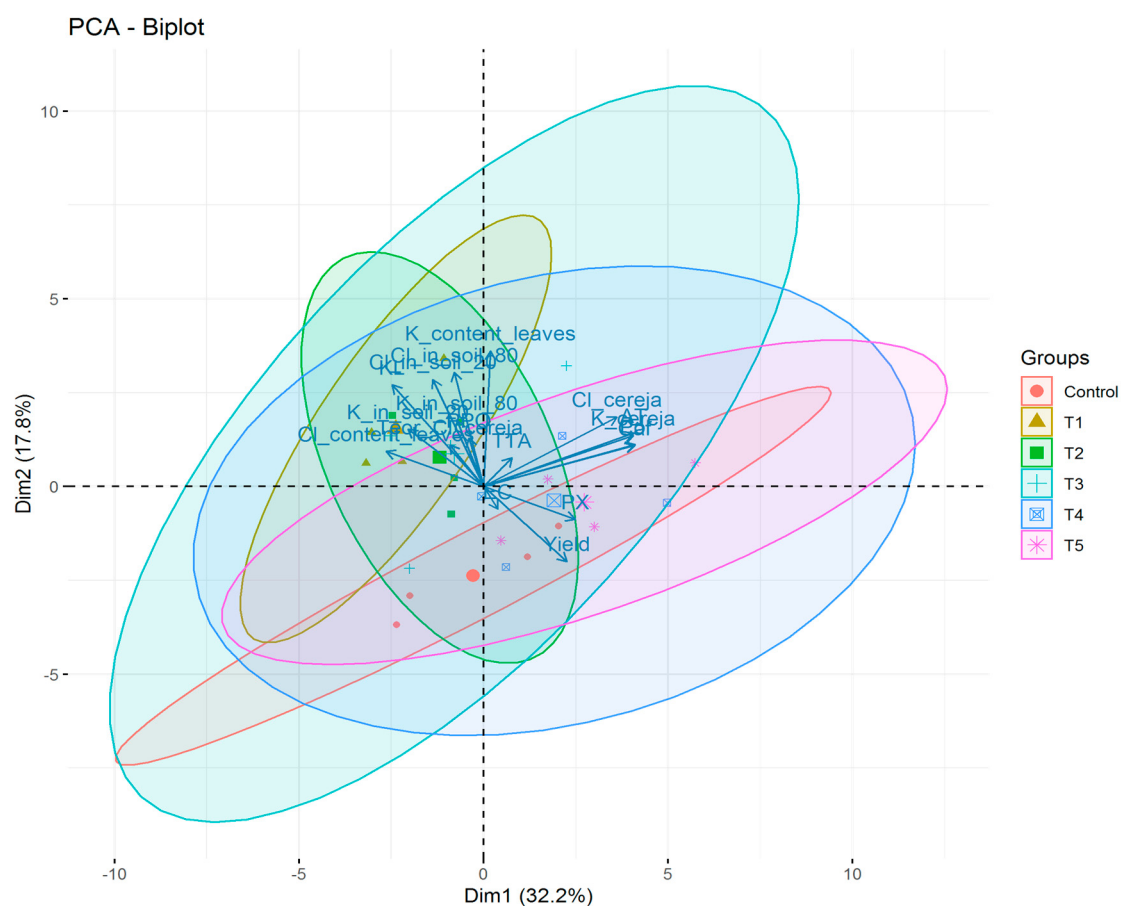

**Figure S6.** Principal component analysis for the harvest of 2018/2019 considering agronomic data. PPO = activity of the enzyme polyphenol oxidase; KL = K leaching; TTA = total titratable acidity; EC = electric conductivity; Pol = total phenolic compounds; Caf = content of caffeine; TS = content of total sugars; K in the soil 20 = stock of K in the 0-20 cm layer; K in the soil 80 = stock of K in the 20-80 cm layer; Cl in the soil 20 = stock of Cl in the 0-20 cm layer; Cl in the soil 80 = stock of Cl in the 20-80 cm layer, K rem. by beans: K removal by the beans, Cl rem. by beans: Cl removal by the beans. T1: 100% KCl; T2: 75% KCl + 25% K<sub>2</sub>SO<sub>4</sub>; T3: 50% KCl + 50% K<sub>2</sub>SO<sub>4</sub>; T4: 25% KCl + 75% K<sub>2</sub>SO<sub>4</sub>; T5: 100% K<sub>2</sub>SO<sub>4</sub>; control did not receive K<sub>2</sub>O.

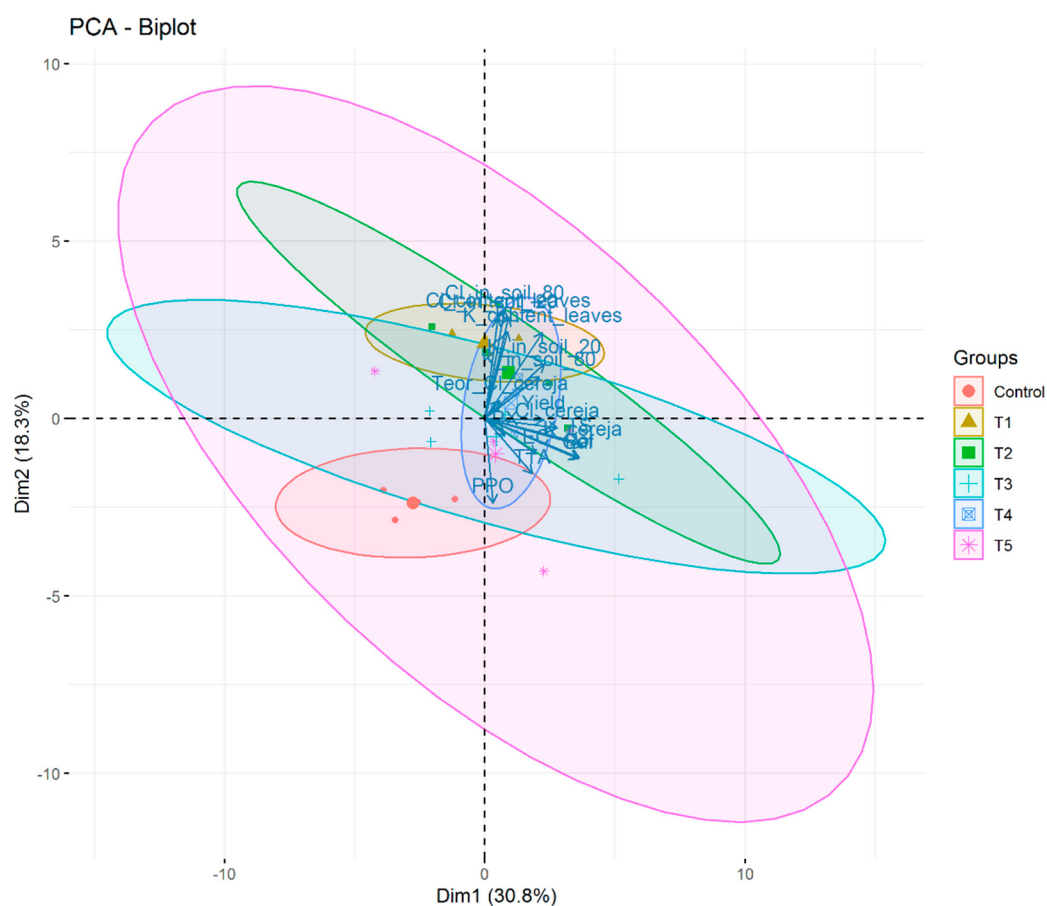

**Figure S7.** Principal component analysis for the harvest of 2019/2020 considering agronomic data. PPO = activity of the enzyme polyphenol oxidase; KL = K leaching; TTA = total titratable acidity; EC = electric conductivity; Pol = total phenolic compounds; Caf = content of caffeine; TS = content of total sugars; K in the soil 20 = stock of K in the 0-20 cm layer; K in the soil 80 = stock of K in the 20-80 cm layer; Cl in the soil 20 = stock of Cl in the 0-20 cm layer; Cl in the soil 80 = stock of Cl in the 20-80 cm layer, K rem. by beans: K removal by the beans, Cl rem. by beans: Cl removal by the beans. T1: 100% KCl; T2: 75% KCl + 25% K<sub>2</sub>SO<sub>4</sub>; T3: 50% KCl + 50% K<sub>2</sub>SO<sub>4</sub>; T4: 25% KCl + 75% K<sub>2</sub>SO<sub>4</sub>; T5: 100% K<sub>2</sub>SO<sub>4</sub>; control did not receive K<sub>2</sub>O.

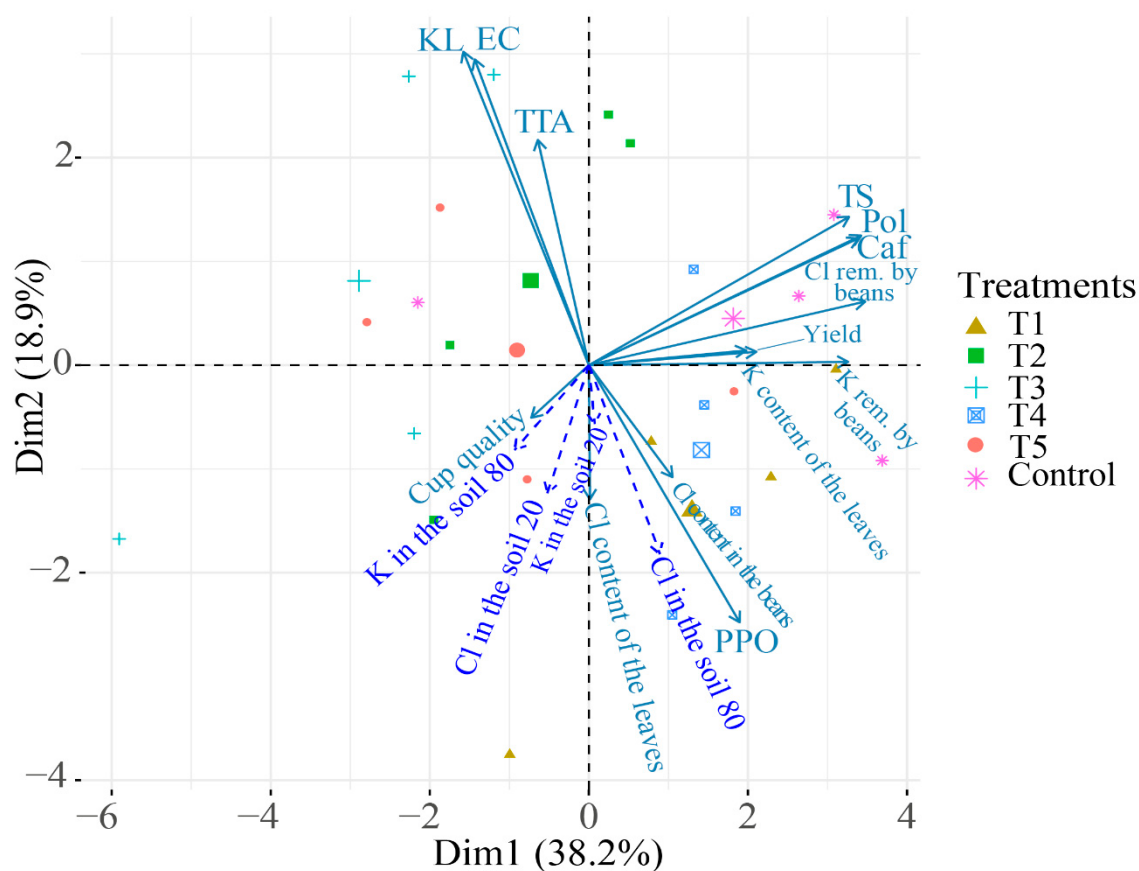

**Figure S8.** Principal component analysis for the harvest of 2017/2018. PPO = activity of the enzyme polyphenol oxidase; KL = K leaching; TTA = total titratable acidity; EC = electric conductivity; Pol = total phenolic compounds; Caf = content of caffeine; TS = content of total sugars; K in the soil 20 = stock of K in the 0-20 cm layer; K in the soil 80 = stock of K in the 20-80 cm layer; Cl in the soil 20 = stock of Cl in the 0-20 cm layer; Cl in the soil 80 = stock of Cl in the 20-80 cm layer, K rem. by beans: K removal by the beans, Cl rem. by beans: Cl removal by the beans. T1: 100% KCl; T2: 75% KCl + 25% K<sub>2</sub>SO<sub>4</sub>; T3: 50% KCl + 50% K<sub>2</sub>SO<sub>4</sub>; T4: 25% KCl + 75% K<sub>2</sub>SO<sub>4</sub>; T5: 100% K<sub>2</sub>SO<sub>4</sub>; control did not receive K<sub>2</sub>O.
